# Supplementary material
Source: publisher figshare collection journal article supplement (https://gsajournals.figshare.com/ndownloader/files/22851416)
Supplement: Supplementary file 1 [file 22851416]

**Figure S2. Cross-validation results for conStruct for K-values 1 to 8 for spatial (blue) and non-spatial (green) models using 40 iterations.**
